# Supplementary material for: ReQON: a Bioconductor package for recalibrating quality scores from next-generation sequencing data
Source: Springer Nature journal article supplement (doi:10.1186/1471-2105-13-221), 2012-09-04

**A** Distribution of Errors by Read Position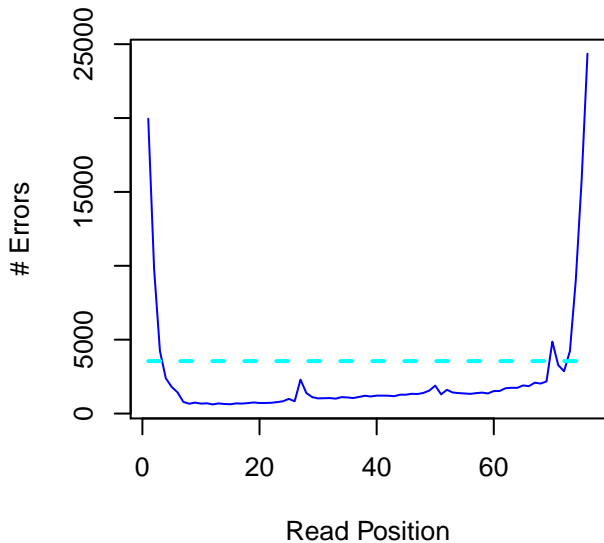**B** Frequency Distributions of Quality Scores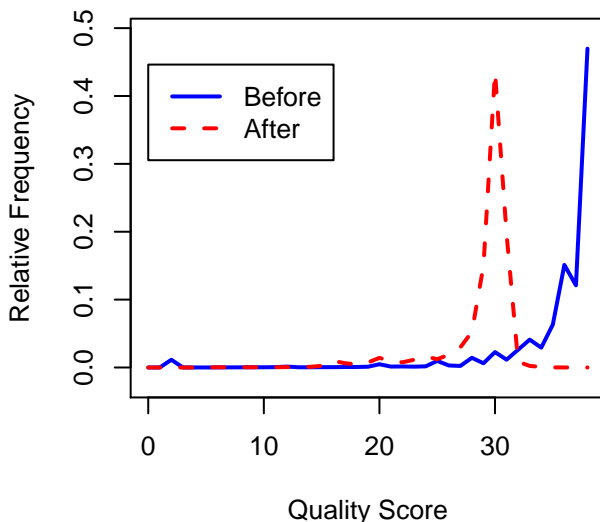**C** Reported vs. Empirical Quality: Before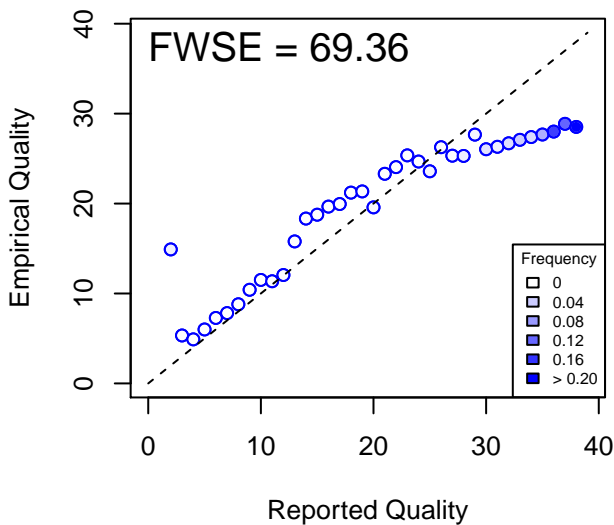**D** Reported vs. Empirical Quality: After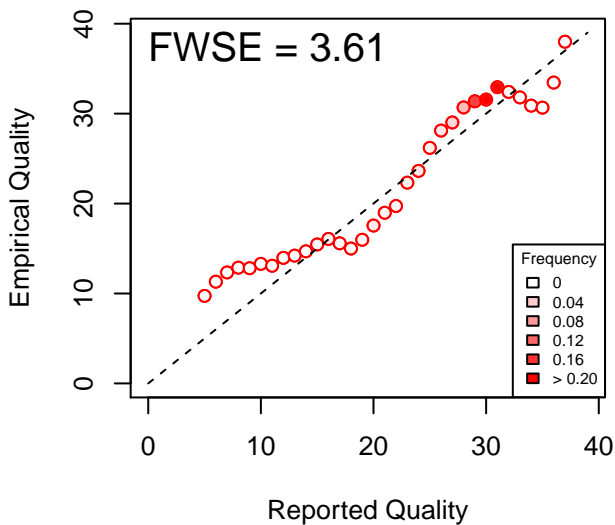

Supplement: 12859_2012_5373_MOESM1_ESM.pdf [file 12859_2012_5373_MOESM1_ESM.pdf]
